1 **Type of the Paper: Article**

2

3 **Title: Determinants and Patterns of Contraceptive Use among Sexually Active Women living**  
4 **with HIV in Ibadan, Nigeria.**

5

6 **Folahanmi T. Akinsolu<sup>1,2\*</sup>, Zaniab O. Adegbite<sup>1</sup>, Samuel Bankole<sup>1</sup>, Abisola Lawale<sup>1</sup>,**  
7 **Ifeoluwa E. Adewole<sup>1</sup>, Olunike R. Abodunrin<sup>1,3</sup>, Mobolaji T. Olagunju<sup>4</sup>, Oluwabukola M.**  
8 **Ola<sup>1</sup>, Abel Chukwuemeka<sup>1</sup>, Aisha O. Gambari<sup>1,2</sup>, Diana W. Njuguna<sup>7</sup>, Jacinta N. Nwogu-**  
9 **Attah<sup>1</sup>, Abideen O. Salako<sup>1,2</sup>, Akim T. Lukwa<sup>5,6</sup>, Ebiere Herbertson<sup>2</sup>, George U. Eleje<sup>8</sup>, and**  
10 **Oliver C. Ezechi<sup>1,2</sup>**

11

12 <sup>1</sup>Lead City University, Ibadan

13 <sup>2</sup>Nigerian Institute of Medical Research, Lagos

14 <sup>3</sup>Lagos State Health Management Agency, Lagos

15 <sup>4</sup>Nanjing Medical University, Jiangning, Jiangsu Province, China.

16 <sup>5</sup>University of Cape Town, South Africa

17 <sup>6</sup>DSI-NRF Centre of Excellence in Epidemiological Modelling and Analysis, Stellenbosch  
18 University, South Africa

19 <sup>7</sup>Dedan Kimathi University of Technology, Nyeri, Kenya

20 <sup>8</sup>Nnamdi Azikiwe University Teaching Hospital, Nnewi, Nigeria,

21

22

23 Folahanmi T. Akinsolu<sup>1,2,\*</sup>,

24 <sup>1</sup>Lead City University, Ibadan

25 <sup>2</sup>Nigerian Institute of Medical Research, Lagos

26 Email: [akinsolu.folahanmi@lcu.edu.ng](mailto:akinsolu.folahanmi@lcu.edu.ng), [Folahanmi.tomiwa@gmail.com](mailto:Folahanmi.tomiwa@gmail.com)

27 ORCID: 0000-0002-6782-9820

28

29 Zaniab O. Adegbite<sup>1</sup>,

30 <sup>1</sup>Lead City University, Ibadan

31 Email: [adegbitezainab29@gmail.com](mailto:adegbitezainab29@gmail.com)

32

33 Abisola Lawale<sup>1</sup>,

34 <sup>1</sup>Lead City University, Ibadan

35 Email: [abisola.lawale@gmail.com](mailto:abisola.lawale@gmail.com)

36

37 Samuel Bankole<sup>1</sup>,

38 <sup>1</sup>Lead City University, Ibadan

39 Email: [samuelbankole01@yahoo.com](mailto:samuelbankole01@yahoo.com)

40

41 Ifeoluwa E. Adewole<sup>1</sup>,

42 <sup>1</sup>Lead City University, Ibadan

43 Email: [thefeoluwa@gmail.com](mailto:thefeoluwa@gmail.com)

44 ORCID: 0000-0003-3992-1205

45

46 Olunike R. Abodunrin<sup>1,3</sup>,

47 <sup>1</sup>Lead City University, Ibadan

48 <sup>3</sup>Lagos State Health Management Agency, Lagos

49 Email: [abodunrinolunike@gmail.com](mailto:abodunrinolunike@gmail.com)

50 ORCID: 0009-0000-5258-1220

51

52 Mobolaji T. Olagunju<sup>4</sup>,

53 <sup>4</sup>Nanjing Medical University, Jiangsu Province, China.

54 Email: [olagunjumobolaji@gmail.com](mailto:olagunjumobolaji@gmail.com)

55 ORCID: 0009-0001-5064-9444

56

57 Oluwabukola M. Ola<sup>1</sup>

58 <sup>1</sup>Lead City University, Ibadan

59 Email: [olaoluwabukolamary@gmail.com](mailto:olaoluwabukolamary@gmail.com)

60 ORCID: 0009-0005-8766-2852

61

62 Abel Chukwuemeka<sup>1</sup>

63 <sup>1</sup>Lead City University, Ibadan

64 Email: [adoncollion@gmail.com](mailto:adoncollion@gmail.com)

65 ORCID: 0000-0003-1461-5711

66

67 Aisha O. Gambari<sup>1,2</sup>

68 <sup>1</sup>Lead City University, Ibadan

69 <sup>2</sup>Nigerian Institute of Medical Research, Lagos

70 Email: [ayeeshagambari@gmail.com](mailto:ayeeshagambari@gmail.com)

71

72 Jacinta N. Nwogu-Attah<sup>1</sup>,

73 <sup>1</sup>Lead City University, Ibadan

74 Email: [nwogu.jacinta@lcu.edu.ng](mailto:nwogu.jacinta@lcu.edu.ng); [jacintaamaka@gmail.com](mailto:jacintaamaka@gmail.com)

75

76 Akim T. Lukwa<sup>5,6</sup>,

77 <sup>5</sup>University of Cape Town, South Africa

78 <sup>6</sup>DSI-NRF Centre of Excellence in Epidemiological Modelling and Analysis (SACEMA),  
79 Stellenbosch University, South Africa.

80 Email: [lkwaki001@myuct.ac.za](mailto:lkwaki001@myuct.ac.za) , [tafadzwalukwa@gmail.com](mailto:tafadzwalukwa@gmail.com) , [akimtafadzwa@sun.ac.za](mailto:akimtafadzwa@sun.ac.za)

81

82 Diana W. Njuguna<sup>7</sup>,

83 <sup>7</sup>Dedan Kimathi University of Technology

84 Email: [Diana.njuguna@dkut.ac.ke](mailto:Diana.njuguna@dkut.ac.ke)

85

86 Abideen O. Salako<sup>1,2</sup>,

87 <sup>1</sup>Lead City University, Ibadan

88 <sup>2</sup>Nigerian Institute of Medical Research, Lagos

89 Email: [salako.abideennaheem@nimr.gov.ng](mailto:salako.abideennaheem@nimr.gov.ng), [salako.abideennaheem@gmail.com](mailto:salako.abideennaheem@gmail.com)

90 ORCID: 0000-0002-3018-3712

91

92 Ebiere Herbertson<sup>2</sup>,

93 <sup>2</sup>Nigerian Institute of Medical Research, Lagos

94 Email: [ebiere.herbertson@gmail.com](mailto:ebiere.herbertson@gmail.com)

95

96 George U. Eleje<sup>8</sup>,

97 <sup>8</sup>Nnamdi Azikiwe University Teaching Hospital (NAUTH), Nnewi, Nigeria,

98 Email: [elejegeorge1@gmail.com](mailto:elejegeorge1@gmail.com)

99

100 Oliver C. Ezechi<sup>1,2</sup>,

101 <sup>1</sup>Lead City University, Ibadan

102 <sup>2</sup>Nigerian Institute of Medical Research, Lagos

103 Email: [oezechi@nimr.gov.ng](mailto:oezechi@nimr.gov.ng), [oezechi@yahoo.co.uk](mailto:oezechi@yahoo.co.uk)

104 ORCID: 0000-0003-0688-3898

105

106 Correspondence:

107 Folahanmi T. Akinsolu<sup>1,2,\*</sup>,

108 <sup>1</sup>Lead City University, Ibadan

109 <sup>2</sup>Nigerian Institute of Medical Research, Lagos

110 Email: [akinsolu.folahanmi@lcu.edu.ng](mailto:akinsolu.folahanmi@lcu.edu.ng), [folahanmi.tomiwa@gmail.com](mailto:folahanmi.tomiwa@gmail.com)

111

112 **Abstract**

113 **Background:** Contraception is a strategy to meet the family planning goals of women living with  
114 human immunodeficiency virus (WLHIV) as well as to reduce the transmission of HIV. There is  
115 limited data from Nigeria, where HIV prevalent is the second-largest in the world. This study  
116 aimed to examine contraceptive use and identify factors influencing its use among sexually active  
117 WLHIV in Ibadan, Nigeria.

118 **Methods:** A facility-based cross-sectional study was conducted involving 443 sexually active  
119 WLHIV. The inclusion criteria were WLHIV, aged 18–49 years, who asserted being fecund and  
120 sexually active. An adopted questionnaire was used to collect data, and the data was analyzed  
121 using the Statistical Package for Social Sciences (SPSS) Windows version 25. Statistical  
122 significance was set at  $p < 0.05$ .

123 **Results:** Among sexually active WLHIV ( $n = 443$ ), 73.1% used contraceptives, with 26.9% having  
124 unmet needs. The results revealed a significant association between employment status and the use  
125 of contraceptives (AOR] = 2.150; 95% CI 1.279–3.612  $p=0.004$ ); accessibility to contraceptive  
126 methods and the use of contraceptives (AOR = 21.483; 95% CI 7.279–63.402  $p=0.00$ ). Also, a  
127 significant association was found between payment for service and contraceptive use (AOR =  
128 14.343; 95% CI 2.705-76.051;  $p = 0.003$ ). Previous reactions towards contraceptive use were also  
129 significantly associated with contraceptive use (AOR = 14.343; 95% CI 2.705-76.051  $p = 0.003$ ).  
130 The dual contraceptives usage rate was 30.7%.

131 **Conclusions:** Although contraceptive use among sexually active WLHIV was high, the study  
132 highlighted the need for increased adoption of dual contraceptive methods to mitigate the risk of  
133 unintended pregnancy and HIV re-infection among this population. It emphasized the importance  
134 of continuous sensitization and counseling services healthcare providers provide to promote  
135 contraceptive use among WLHIV.

136

137 **Keywords:** Contraceptive, Sexually Active Women, Human Immunodeficiency Virus

138

## 139 **Introduction**

140 Globally, there are about 37.7 million Human Immunodeficiency Virus (HIV)-positive individuals  
141 worldwide, of which 20.2 million are women living with HIV<sup>1</sup>. It has been determined that Sub-  
142 Saharan Africa is the area most severely affected by the HIV epidemic, accounting for more than  
143 two-thirds of all HIV infections worldwide. Nigeria has the second-largest HIV epidemic in the  
144 world and the region's highest incidence of new infections. In Nigeria, 1.7 million people lived  
145 with HIV (PLHIV) in 2020<sup>2</sup>. Women can make independent choices about having children and  
146 having sex, regardless of their HIV status. Women living with HIV(WLHIV) must be informed,  
147 given the freedom to choose a safe, effective method of contraception, and provided with it at  
148 nearby health centers. Because it prevents unplanned pregnancies, contraception may also be  
149 essential for preventing Mother-to-Child Transmission of HIV<sup>3</sup>. Strengthening contraceptive  
150 programs is therefore important to lower the high incidence of unintended pregnancies, which  
151 could contribute to the elimination of HIV/AIDS outbreaks by 2030 (the Sustainable Development  
152 Goal 3.3)<sup>4</sup>.

153 There appears to be a substantial unmet need for contraception among WLHIV and contraceptive  
154 failure due to the high incidence of unwanted pregnancy and abortion<sup>5</sup>. Nigeria accounts for 70%  
155 of sexually active WLHIV, 5.5 million WLHIV births annually, and 15% of the world's low  
156 contraceptive uptake<sup>6</sup>. Furthermore, prior research found that Nigerian WLHIV had a high level  
157 of awareness about contraception, but that knowledge did not match their use of contraceptives,  
158 which was linked to a high proportion of unwanted pregnancies<sup>7</sup>.

159 Women who are fecund, sexually active, and who report not wanting any more children or wishing  
160 to delay the next child are considered to have unmet needs, according to the WHO<sup>8</sup>. Because ART  
161 has increased the overall survival rate of PLHIV, women living with HIV must have defined  
162 reproductive life plans that include accessible access to contraception. Most of the research that  
163 has been done on contraceptive use among WLHIV has focused on married women<sup>9</sup>. Because of  
164 this, sexual activity among sexually active unmarried women puts them at a higher risk of having  
165 an unexpected child because of the idea that sex can only take place within the setting of a married  
166 relationship. Therefore, there is a lack of reproductive plans for these women through health  
167 services<sup>10</sup>. Although the WHO has recommended that WLHIV have the right to choose any method  
168 of contraception, similar to HIV-negative women, the choice of contraception in the presence of

169 HIV appears to be more complicated because WLHIV is required to strike a balance between the  
170 prevention of unintended pregnancy and HIV transmission<sup>11</sup>.

171 Sexually active WLHIV can also plan their reproductive lives to avoid unwanted pregnancy and  
172 enjoy parenthood like their counterparts who are not living with HIV. Hence, this study aims to  
173 identify key predictors of contraceptive use among sexually active WLHIV in Ibadan, Oyo State,  
174 Nigeria.

175

## 176 **Materials and Methods**

177

### 178 **Study Design and Setting**

179 The study adopted a facility-based cross-sectional survey conducted among sexually active  
180 WLHIV. The study was conducted in three (3) HIV treatment centers in Oyo State, Nigeria:  
181 Adeoyo Maternity Hospital Yemetu, State Hospital Adeoyo Ring Road, and St. Annes Anglican  
182 Hospital Molete. This study was carried out between September and November 2022.

183

### 184 **Study population and sampling**

185 A purposive sampling method was adopted to select the health facilities because ART treatment  
186 is unavailable in all facilities. The participants for the study were randomly selected from each of  
187 the health facilities. Inclusion criteria for this study were WLHIV, who reported to (a) be aged  
188 between 18 and 49 years and (b) have been sexually active within the last six months. In this study,  
189 a flowchart illustrated that 750 WLHIV were interviewed, of which 443 sexually active WLHIV  
190 were analyzed. (See Figure 1)

191

### 192 **Data Collection**

193 Data was collected using self-structured and adapted questionnaires from a previous study on  
194 contraceptive use among sexually active WLHIV<sup>12</sup>. The questionnaire was divided into three  
195 sections: Socio-Demography Data Questionnaire among sexually active WLHIV, Contraceptive  
196 Use Questionnaire among sexually active WLHIV, and Perceived factors influencing  
197 Contraceptive Use Questionnaire among sexually active WLHIV. The selected participants were  
198 those who voluntarily consented to participate. The Research Assistants translated the  
199 questionnaires into the language participants understood, Yoruba, for accessible communication.

200

### 201 **Statistical Analysis**

202 The information obtained from the completed questionnaire was processed and analyzed using  
203 Statistical Package for Social Science version 25. Descriptive statistics of frequency and  
204 proportion were used for the use of contraceptives. Meanwhile, logistic regression was also used  
205 to determine the association between various socio-demographic factors and contraceptive use. A  
206 P-value less than 0.05 was considered to be statistically significant.

207

208 **Ethical Considerations**

209 Ethical approval for this study was obtained from the University Research Ethics Committee  
210 (HREC) of Lead City University, Ibadan, Ibadan, Oyo State (LUC-REC/22/124), and Ibadan, Oyo  
211 State Ministry of Health Department of Planning Research & Statistics Division (AD 13/479/  
212 44542A). Official permission was obtained from hospitals included in this study. The consent  
213 procedure was conducted in a separate and private room, administered by trained data collectors.  
214 Participants were assured that their involvement was entirely voluntary, and they retained the right  
215 to decline participation or revoke their consent at any juncture. Significantly, it was stressed that  
216 their participation would not impact the medical care they received. Participants were also apprised  
217 that the survey might entail sensitive or personal inquiries related to reproductive health concerns,  
218 which could be uncomfortable or distressing. Also, participants were explicitly informed that they  
219 were under no obligation to answer any question that they found uncomfortable and had the liberty  
220 to withdraw from the study or choose not to respond to specific questions at any point. In cases  
221 where participants required emotional support, female nurses were available to offer psychological  
222 assistance. All collected data were transformed into an anonymized format and stored on laptops  
223 protected by passwords throughout the data collection. Furthermore, the data was stored on secure,  
224 password-protected computers to ensure confidentiality and security.

225



226 **RESULTS**

227

228 **Socio-demographic Characteristics of Participants**

229 Among 443 sexually active WLHIV eligible for this study, most of the participants, 324 (73.1%),  
230 use contraceptives, with a total unmet need of 119 (26.9%). The mean age was 36.88 years (SD=  
231 6.85 years). Most participants (389(87.8%) were married, and 380 (85.8%) identified as Yoruba.  
232 From an academic perspective, the majority were secondary school leavers, 199 (44.9%), while  
233 357 (80.6%) of participants were employed, and 214 (48.3 %) of the women reported monthly  
234 income of less than 44.71 USD (NGN 33,000). (See Table 1)

235

236

237 **Table 1. Socio-demographic Characteristics of Study Participants (n =433)**

|                               | <b>Contraceptive User<br/>N=324<br/>[73.1%]</b> | <b>Non-users of<br/>Contraceptives<br/>N=119<br/>[26.9%]</b> |
|-------------------------------|-------------------------------------------------|--------------------------------------------------------------|
| <b>Variable</b>               | <b>N [%]</b>                                    | <b>N [%]</b>                                                 |
| <b>Age</b>                    |                                                 |                                                              |
| Mean ± SD                     | 36.62±6.70                                      | 37.59 ± 7.20                                                 |
| <b>Marital Status</b>         |                                                 |                                                              |
| Married                       | 290 [74.6]                                      | 99 [25.4]                                                    |
| Divorce                       | 7 [70.0]                                        | 3 [30.0]                                                     |
| Widowed                       | 9 [56.2]                                        | 7 [43.8]                                                     |
| Separated                     | 8 [66.7]                                        | 4 [33.3]                                                     |
| Single                        | 10 [62.5]                                       | 6 [37.5]                                                     |
| <b>Ethnic Group</b>           |                                                 |                                                              |
| <b>Yoruba</b>                 | 285 [75.0]                                      | 95 [25.0]                                                    |
| Igbo                          | 25 [62.5]                                       | 15 [37.5]                                                    |
| Hausa                         | 6 [50.0]                                        | 6 [50.0]                                                     |
| Others                        | 8 [72.7]                                        | 3 [27.3]                                                     |
| <b>Religion</b>               |                                                 |                                                              |
| Christianity                  | 188 [72.0]                                      | 73 [28.0]                                                    |
| Islam                         | 136 [74.7]                                      | 46 [25.3]                                                    |
| <b>Educational Level</b>      |                                                 |                                                              |
| Primary level                 | 93 [78.8]                                       | 25 [21.2]                                                    |
| Secondary level               | 135 [67.8]                                      | 64 [32.2]                                                    |
| Tertiary level                | 65 [78.3]                                       | 18 [21.7]                                                    |
| None                          | 31 [72.1]                                       | 12 [27.9]                                                    |
| <b>Employment Status</b>      |                                                 |                                                              |
| Employed                      | 273 [76.5]                                      | 84 [23.5]                                                    |
| Unemployed                    | 51 [59.3]                                       | 35 [40.7]                                                    |
| <b>Type of Partner</b>        |                                                 |                                                              |
| Spouse                        | 269 [74.9]                                      | 90 [25.1]                                                    |
| Steady                        | 32 [80.0]                                       | 8 [20.0]                                                     |
| Causal                        | 14 [53.8]                                       | 12 [46.2]                                                    |
| None                          | 9 [50.0]                                        | 9 [50.0]                                                     |
| <b>Monthly Income</b>         |                                                 |                                                              |
| < 44.71 USD (NGN 33,000)      | 225(77.6)                                       | 65(22.4)                                                     |
| ≥ 44.71 USD (NGN 33,000)      | 99(64.7)                                        | 54(35.3)                                                     |
| <b>Know Partner's Status</b>  |                                                 |                                                              |
| Yes                           | 276 [76.9]                                      | 83 [23.1]                                                    |
| No                            | 48 [57.1]                                       | 36 [42.9]                                                    |
| <b>If Yes, Partner Status</b> |                                                 |                                                              |

|                |            |           |
|----------------|------------|-----------|
| Positive       | 111 [77.1] | 33 [22.9] |
| Negative       | 161 [78.2] | 45 [21.8] |
| Not Applicable | 52 [55.9]  | 41 [44.1] |

238

### 239 **Contraceptive Use among Sexually Active WLHIV**

240 Among sexually active WLHIV, 73.1% used contraceptives. Most participants used male condoms  
241 (51.4%), followed by pills (12.50%), and surprisingly, 11.5 % of the sexually active WLHIV used  
242 female condoms. (See Figure 2)

243 Additionally, the number of single contraception users was 188 (42.4%), while the number of dual  
244 contraception users was 136 (30.7%). (See Table 2)

245

### 246 **Table 2: Level of Dual Contraceptive Utilization**

| Variable                   | N [%]      |
|----------------------------|------------|
| Dual Contraceptives Usage  | 136 [30.7] |
| Single Contraceptive Usage | 188 [42.4] |
| No Usage                   | 119 [26.9] |

247

### 248 **Factors Associated with Contraceptive Use among Sexually Active WLHIV**

249 After adjusting for the seven significant variables in the logistic regression analysis, only four risk  
250 factors had a statistically significant association with contraceptive use among sexually active  
251 women living with HIV. These factors are *Employment Status* - unemployed participants were  
252 twice times less likely to use contraceptives than their employed counterparts (OR = 2.150, 95%  
253 CI 1.279-3.612); *Accessibility to Contraceptive Methods* - participants who obtained their  
254 contraceptives outside the ART center were less likely to use contraceptives compared to those  
255 who acquired them at the ART center (OR = 21.483, 95% CI 7.279–63.401); *Payment for Service*  
256 - participants who had to pay for the service were less likely to use contraceptives than those who  
257 did not (OR = 14.343; 95% CI 2.705-76.051); *Previous Negative Reaction to Contraceptives* were  
258 less likely to make use of contraceptives (OR = 3.866; 95% CI 0.00). (See Table 4)

259

260

261

262 **Table 4: Factors Affecting the Use of Contraceptives among Sexually Active Women Living**  
 263 **with HIV**

| <b>Variables</b>                                  | <b>Adjusted Odd Ratio (95% CI)</b> | <b>P value</b> |
|---------------------------------------------------|------------------------------------|----------------|
| <b>Religion</b>                                   |                                    |                |
| Christianity                                      | 0.461(0.176, 1.213)                | 0.117          |
| Islam                                             | Ref                                | Ref            |
| <b>Education Level</b>                            |                                    |                |
| Primary Level                                     | 0.518 (0.162, 1.651)               | 0.266          |
| Secondary Level                                   | 1.405(0.438, 4.511)                | 0.380          |
| Tertiary Level                                    | 0.354(0.086,1.448)                 | 0.058          |
| None                                              | Ref                                |                |
| <b>Marital status</b>                             |                                    |                |
| Married                                           | 0.661(0.162,1.651)                 | 0.266          |
| Divorce                                           | 0.490(0.100,2.410)                 | 0.380          |
| Widowed                                           | 0.184(0.032,1.062)                 | 0.585          |
| Separated                                         | 1.799(0.184,17.619)                | 0.614          |
| Single                                            | Ref                                |                |
| <b>Employment Status</b>                          |                                    |                |
| Unemployed                                        | 2.150(1.279,3.612)                 | 0.004*         |
| Employed                                          | Ref                                |                |
| <b>Type of Partner</b>                            |                                    |                |
| Spouse                                            | 0.498(0.124,1.993)                 | 0.233          |
| Steady                                            | 0.102(0.022,0.485)                 | 0.067          |
| Causal                                            | 0.338(0.035,3.300)                 | 0.062          |
| None                                              | Ref                                |                |
| <b>Get Contraceptives outside ART Center</b>      |                                    |                |
| Yes                                               | 21.483(7.279,63.402)               | 0.00*          |
| No                                                | Ref                                |                |
| <b>Distance to the health facilities</b>          |                                    |                |
| ½ to 1 kilometer                                  | 2.669(0.949,0.949)                 | 0.639          |
| 2 to 3 kilometres                                 | 4.021(1.343,12.036)                | 0.304          |
| 4 to 5 kilometres                                 | Ref                                |                |
| <b>Payment for Services</b>                       |                                    |                |
| Yes                                               | 14.343(2.705,76.051)               | 0.020*         |
| No                                                | Ref                                |                |
| <b>Adverse Reaction while using Contraceptive</b> |                                    |                |
| Yes                                               | Ref                                |                |
| No                                                | 0.006(0.002,0.20)                  | 0.000*         |

## 264 DISCUSSION

265 The study underscored the significant use of contraceptives among sexually active women living  
266 with HIV (WLHIV) in Ibadan, Nigeria, mirroring the contraceptive adoption rates seen in  
267 Ethiopia, where 75% of sexually active WLHIV used contraceptives while the remaining 25%  
268 faced unmet contraceptive requirements<sup>12</sup>. This utilization of contraceptives plays a fundamental  
269 role in advancing family planning goals and reinforcing the Prevention of Mother-To-Child  
270 Transmission (PMTCT) program<sup>13</sup>. Yet, the contrasting findings from Oyo State, Nigeria, remind  
271 us that awareness does not always lead to action. Even with high contraceptive knowledge levels  
272 among WLHIV, usage rates remained disappointingly low<sup>7</sup>. Male condoms were most popular,  
273 trailed by pills and female condoms.

274 Conversely, less conventional methods like male and female sterilization and herbal mixtures were  
275 minimally favored. Compared to data from Togo, these rates were marginally lower<sup>14</sup>. Although  
276 dual contraceptive methods could effectively prevent unwanted pregnancies and STIs, their  
277 adoption was overshadowed by the preference for single methods<sup>15</sup>.

278 Several factors are pivotal in determining contraceptive choices<sup>16,17,18</sup>. Employment status stood  
279 out, corroborated by Banten Province, Indonesia's findings, which identified employment as a  
280 critical influencer<sup>19</sup>. Similarly, the absence of side effects encouraged continuity in contraceptive  
281 use, emphasizing the value of a smooth experience. Contrastingly, the necessity of payments acted  
282 as a deterrent, with a study from Uganda linking payment barriers to reduced contraceptive use<sup>17</sup>.  
283 Nevertheless, the challenges faced by WLHIV are multi-layered. Sociocultural dynamics heavily  
284 influence contraceptive choices<sup>20</sup>. In many African settings, reproductive choices are often  
285 determined more by a woman's partner than by herself. Moreover, the stigma attached to HIV  
286 often discourages WLHIV from availing contraceptive services, particularly if healthcare  
287 professionals hold biased views<sup>20,21,22,23</sup>.

288 The types of available contraceptives also matter. The dominant use of male condoms, while  
289 indicative of their dual protective nature against STIs and pregnancies, also shows a limitation in  
290 contraceptive choices. There's an evident need for long-acting methods like IUDs and implants,  
291 offering women greater autonomy, but their accessibility is often constrained by availability or  
292 cost. The role of healthcare infrastructure is undeniable. The inconsistency in contraceptive stock  
293 can discourage WLHIV from relying on specific methods, prompting them to settle for less

294 preferred options. Integrating HIV care with contraceptive services might present a more  
295 consistent and comprehensive solution<sup>7</sup>.

296 Comprehensive counseling provides holistic information about contraceptive options, side effects,  
297 and effectiveness and can significantly guide WLHIV in making informed choices<sup>24,25</sup>. This  
298 approach can demystify misconceptions and align contraceptive choices with individual  
299 reproductive and health goals. Lastly, policy frameworks are pivotal. For effective contraceptive  
300 adoption among WLHIV, governments and health bodies must craft policies prioritizing their  
301 unique challenges, encompassing contraceptive procurement, training of healthcare professionals,  
302 and robust monitoring mechanisms.

303 In essence, while global data paints an overarching picture, addressing the contraceptive needs of  
304 WLHIV requires a deeper understanding of the intricate blend of personal, sociocultural, and  
305 structural factors. Only a holistic approach, cognizant of these intricacies, can genuinely champion  
306 the reproductive rights of every woman.

307 Self-reported data were used, which may be affected by social desirability and recall bias. The  
308 study only focused on women living with HIV and did not include men living with HIV, which  
309 limits the understanding of the contraceptive needs of male partners of women living with HIV.  
310 The study did not explore the impact of cultural and religious beliefs on contraceptive use, which  
311 could significantly influence contraceptive use among this population.

312 The study's strengths include a large representative sample of the three facilities and participants,  
313 including WLHIV, which was possible due to the nature of the facilities that participated in the  
314 study.

315 **CONCLUSION**

316 This study provides evidence that show high levels of contraceptive use among sexually active  
317 WLHIV. However, the study identified the need for greater uptake of dual contraceptive methods  
318 to reduce the risk of unwanted pregnancy and HIV re-infection among WLHIV. The study also  
319 highlighted various factors, such as employment status, access to contraceptive methods, payment  
320 for service, and previous experience with contraceptive use, that influence the use of  
321 contraceptives among this population. These findings have important implications for  
322 policymakers and healthcare providers seeking to improve reproductive health outcomes and  
323 reduce the burden of HIV among WL HIV in Nigeria.

324

325 **Funding:** “This research received no external funding.”

326

327 **Institutional Review Board Statement:** The study was conducted following the Declaration of  
328 Helsinki and approved by the Ethics Committee of Lead City University, Ibadan (Protocol code:  
329 LUC-REC/22/124 and date of approval: September 05, 2022) as well as from the Oyo State  
330 Ministry of Health Research Ethics Committee (Protocol code: AD 13/479/ 44542<sup>A</sup> and date of  
331 approval: August 15, 2022).

332

333 **Informed Consent Statement:** “Informed consent was obtained from all subjects involved in the  
334 study.”

335

336 **Data Availability Statement:** The data used to support the findings of this study are available  
337 from the corresponding author upon request.

338

339 **Acknowledgments:** This work was supported by grants from Fogarty International Center (FIC)  
340 and the National Institute of Health (Funding provided by Fogarty Training Grant:  
341 D43TW010934-03). The content is solely the author's responsibility and does not necessarily  
342 represent the official views of the National Institutes of Health.

343

344 **Conflicts of Interest:** “The authors declare no conflict of interest.”

345



## 346 **References**

- 347 1. United Nations Programme on HIV/AIDS (UNAIDS) (2020). 2019 Report on the global AIDS  
348 epidemic
- 349 2. NACA. "*National strategic framework on HIV and AIDS: 2017-2021.*" (2021).
- 350 3. J.Damian, Damian., M . Johnston George, Erick Martin, Beatrice Temba, and Sia E. Msuya.  
351 "*Prevalence and factors influencing modern contraceptive use among HIV-positive women in*  
352 *Kilimanjaro region, northern Tanzania.*" *Contraception and reproductive medicine* 3, no. 1  
353 (2018): 1-9.
- 354 4. World Health Organization: "*MDGs, millennium development goals to SDGs, sustainable*  
355 *development goals* ".Health in 2015 (2015)
- 356 5. Ope, Beatrice Wuraola. "*Reducing maternal mortality in Nigeria: Addressing maternal health*  
357 *services' perception and experience.*" *Journal of Global Health Reports* 4 (2020): e2020028.
- 358 6. Olufadewa, Isaac, Miracle Adesina, Ruth Oladele, and Toluwase Ayorinde. "*Knowledge of HIV*  
359 *and other sexually transmitted infections and place of delivery among urban women in South-*  
360 *West Nigeria.*" (2022).
- 361 7. Adeleye, Khadija Kofoworola, Margaret Omowaleola Akinwaare, and Prisca Olabisi Adejumo.  
362 "*Reproductive Plans And Utilization of Contraceptives Among Women Living With*  
363 *HIV.*" *International Journal of Maternal and Child Health and AIDS* 8, no. 2 (2019): 120.
- 364 8. Mosisa, Getu, Reta Tsegaye, Bizuneh Wakuma, Diriba Mulisa, Werku Etefa, Muktar Abadiga,  
365 Ginenus Fekadu, Adugna Oluma, and Ebisa Turi. "Fertility desire and associated factors among  
366 people living with HIV in Ethiopia: a systematic review and meta-analysis." *Archives of Public*  
367 *Health* 78, no. 1 (2020): 1-16.
- 368 9. Fite, Robera Olana, Abdurahman Mohammedamin, and Tilaye Workneh Abebe. "Unintended  
369 pregnancy and associated factors among pregnant women in Arsi Negele Woreda, West Arsi  
370 Zone, Ethiopia." *BMC research notes* 11, no. 1 (2018): 1-7.
- 371 10. Tsafack, Marcellin. "Dual contraception use and associated factors among HIV positive  
372 women follow-up at Treatment Center Unit of Yaounde Central Hospital, Cameroon." *Open*  
373 *Access Library Journal* 7, no. 05 (2020): 1.
- 374 11. Tshilonda, Jean Christophe Bukasa, Alphonsine Kabwe Tshibanda, Jean Kituta Katambue,  
375 Godet Kalonda Kabemba, Richard Kabemba Kabemba, Crispin Kasendue Ngoyi, Patrice  
376 Kimpitu Kifwame et al. "*Rate of Use of Female Condoms in Sex Professionals in the City of*

- 377 *Mbuji-Mayi, Democratic Republic of Congo.* "Open Access Library Journal 7, no. 9 (2020):  
378 1-9.
- 379 12. Feyissa, Tesfaye Regassa, Melissa L. Harris, Peta M. Forder, and Deborah Loxton.  
380 "Contraceptive use among sexually active women living with HIV in western Ethiopia." Plos  
381 one 15, no. 8 (2020): e0237212.
- 382 13. Sherwood, Jennifer, Elise Lankiewicz, Beirne Roose-Snyder, Bergen Cooper, Austin Jones,  
383 and Brian Honermann. "The role of contraception in preventing HIV-positive births: global  
384 estimates and projections." BMC Public Health 21, no. 1, 2021: 1-10.
- 385 14. Yaya, Issifou, Akouda Akessiwe Patassi, Dadjia Essoya Landoh, Essodjèlouna Manani  
386 Bignandi, Kanfitine Kolani, Abdel-Daim Daou Namoro, Lihanimpo Djalogue, Didier  
387 Koumavi Ekouevi, and Bayaki Saka. "Modern contraceptive use among HIV-infected women  
388 attending HIV care centres in Togo: a cross-sectional study." BMJ open 8, no. 4, 2018:  
389 e019006.
- 390 15. Mesfin, Yibeltal, Muche Argaw, Shegaw Geze, and Bitew Tefera. "Dual contraceptive use and  
391 factor associated with people living with HIV/AIDS: a systematic review and meta-analysis."  
392 Infectious Diseases in Obstetrics and Gynecology. 2021.
- 393 16. D'Souza, Preethy, Julia V. Bailey, Judith Stephenson, and Sandy Oliver. "Factors influencing  
394 contraception choice and use globally: a synthesis of systematic reviews." The European  
395 Journal of Contraception & Reproductive Health Care 27, no. 5, 2022: 364-372.
- 396 17. Robinet, Lisa, Alexis Jeffredo, and Christophe Clesse. "Factors Influencing Contraceptive  
397 Choice During the Postpartum Period: A Qualitative Systematic Review." Journal of  
398 Midwifery & Women's Health 68, no. 2, 2023: 265-286.
- 399 18. Hlongwa, Mbuzeleni, Tivani Mashamba-Thompson, Sizwe Makhunga, and Khumbulani  
400 Hlongwana. "Evidence on factors influencing contraceptive use and sexual behavior among  
401 women in South Africa: a scoping review." Medicine 99, no. 12 2020.
- 402 19. Haile, Dereje, and Berhanu Lagebo. "Magnitude of dual contraceptive method utilization and  
403 the associated factors among women on antiretroviral treatment in Wolaita zone, Southern  
404 Ethiopia." *Heliyon* (2022): e09595.
- 405 20. Saleem, Haneefa T., Joseph G. Rosen, Caitlin Quinn, Avani Duggaraju, and Caitlin E.  
406 Kennedy. "Contraception values and preferences of people living with HIV: A systematic  
407 review." *Contraception* 111 2022: 48-60.

- 408 21. Willan, Samantha, Andrew Gibbs, Inge Petersen, and Rachel Jewkes. "Exploring young  
409 women's reproductive decision-making, agency and social norms in South African informal  
410 settlements." *PloS one* 15, no. 4 (2020): e0231181.
- 411 22. Kibira, Simon PS, Celia Karp, Shannon N. Wood, Selamawit Desta, Hadiza Galadanci,  
412 Fredrick E. Makumbi, Elizabeth Omoluabi et al. "Covert use of contraception in three sub-  
413 Saharan African countries: a qualitative exploration of motivations and challenges." *BMC*  
414 *Public Health* 20 2020: 1-10.
- 415 23. Kriel, Yolandie, Cecilia Milford, Joanna Cordero, Fatima Suleman, Mags Beksinska, Petrus  
416 Steyn, and Jennifer Ann Smit. "Male partner influence on family planning and contraceptive  
417 use: perspectives from community members and healthcare providers in KwaZulu-Natal,  
418 South Africa." *Reproductive health* 16, no. 1 2019: 1-15.
- 419 24. Patel, Rena C., Elizabeth A. Bukusi, and Jared M. Baeten. "Current and future contraceptive  
420 options for women living with HIV." *Expert opinion on pharmacotherapy* 19, no. 1 2018: 1-  
421 12.
- 422 25. Dehlendorf, Christine, Colleen Krajewski, and Sonya Borrero. "Contraceptive counseling: best  
423 practices to ensure quality communication and enable effective contraceptive use." *Clinical*  
424 *obstetrics and gynecology* 57, no. 4 2014: 659.
- 425
- 426
- 427
- 428
- 429
- 430

431 **Figure Captions**

432 Figure 1: Flow Chart Illustrating the Eligibility Process to Obtain The Final Sample For Analysis

433 of Sexually Active WLHIV

434 Figure 2: Contraceptive Methods Used Among Sexually Active WLHIV

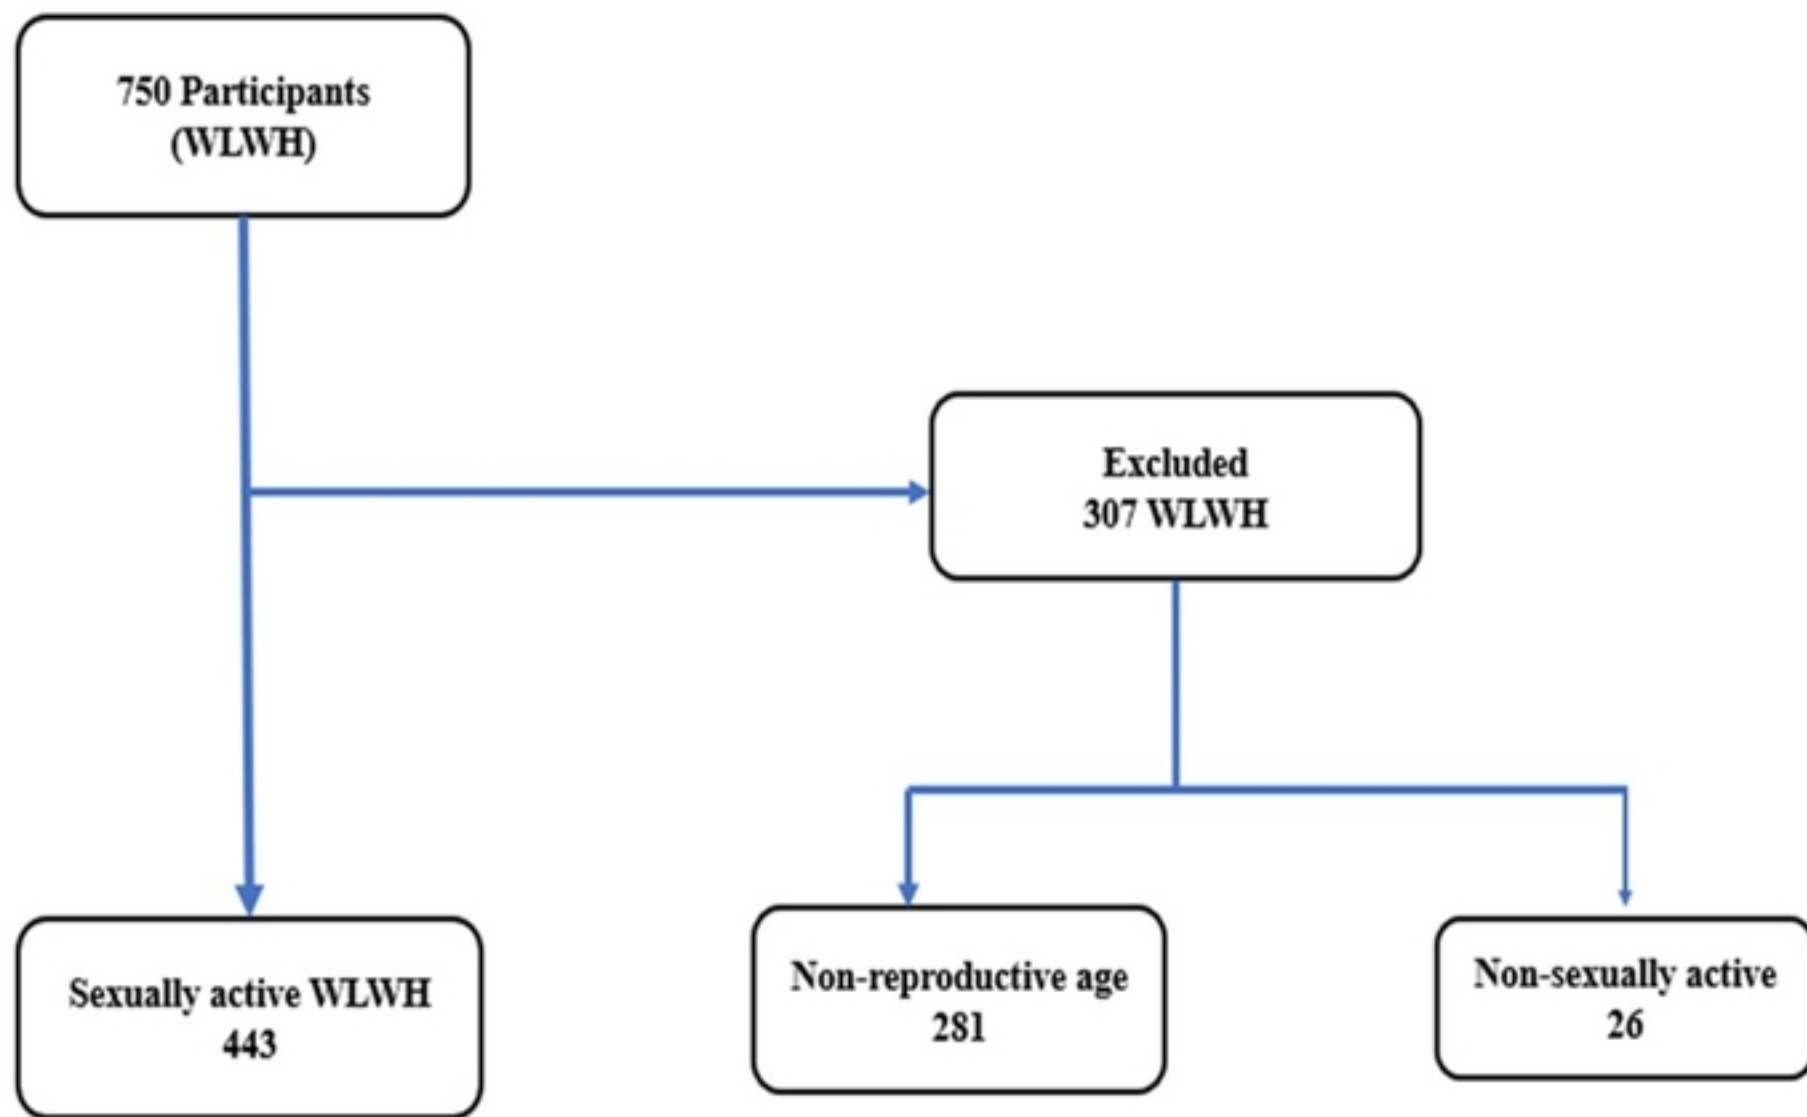

Flow Chart Illustrating the Eligibility Process to Obtain The Final S

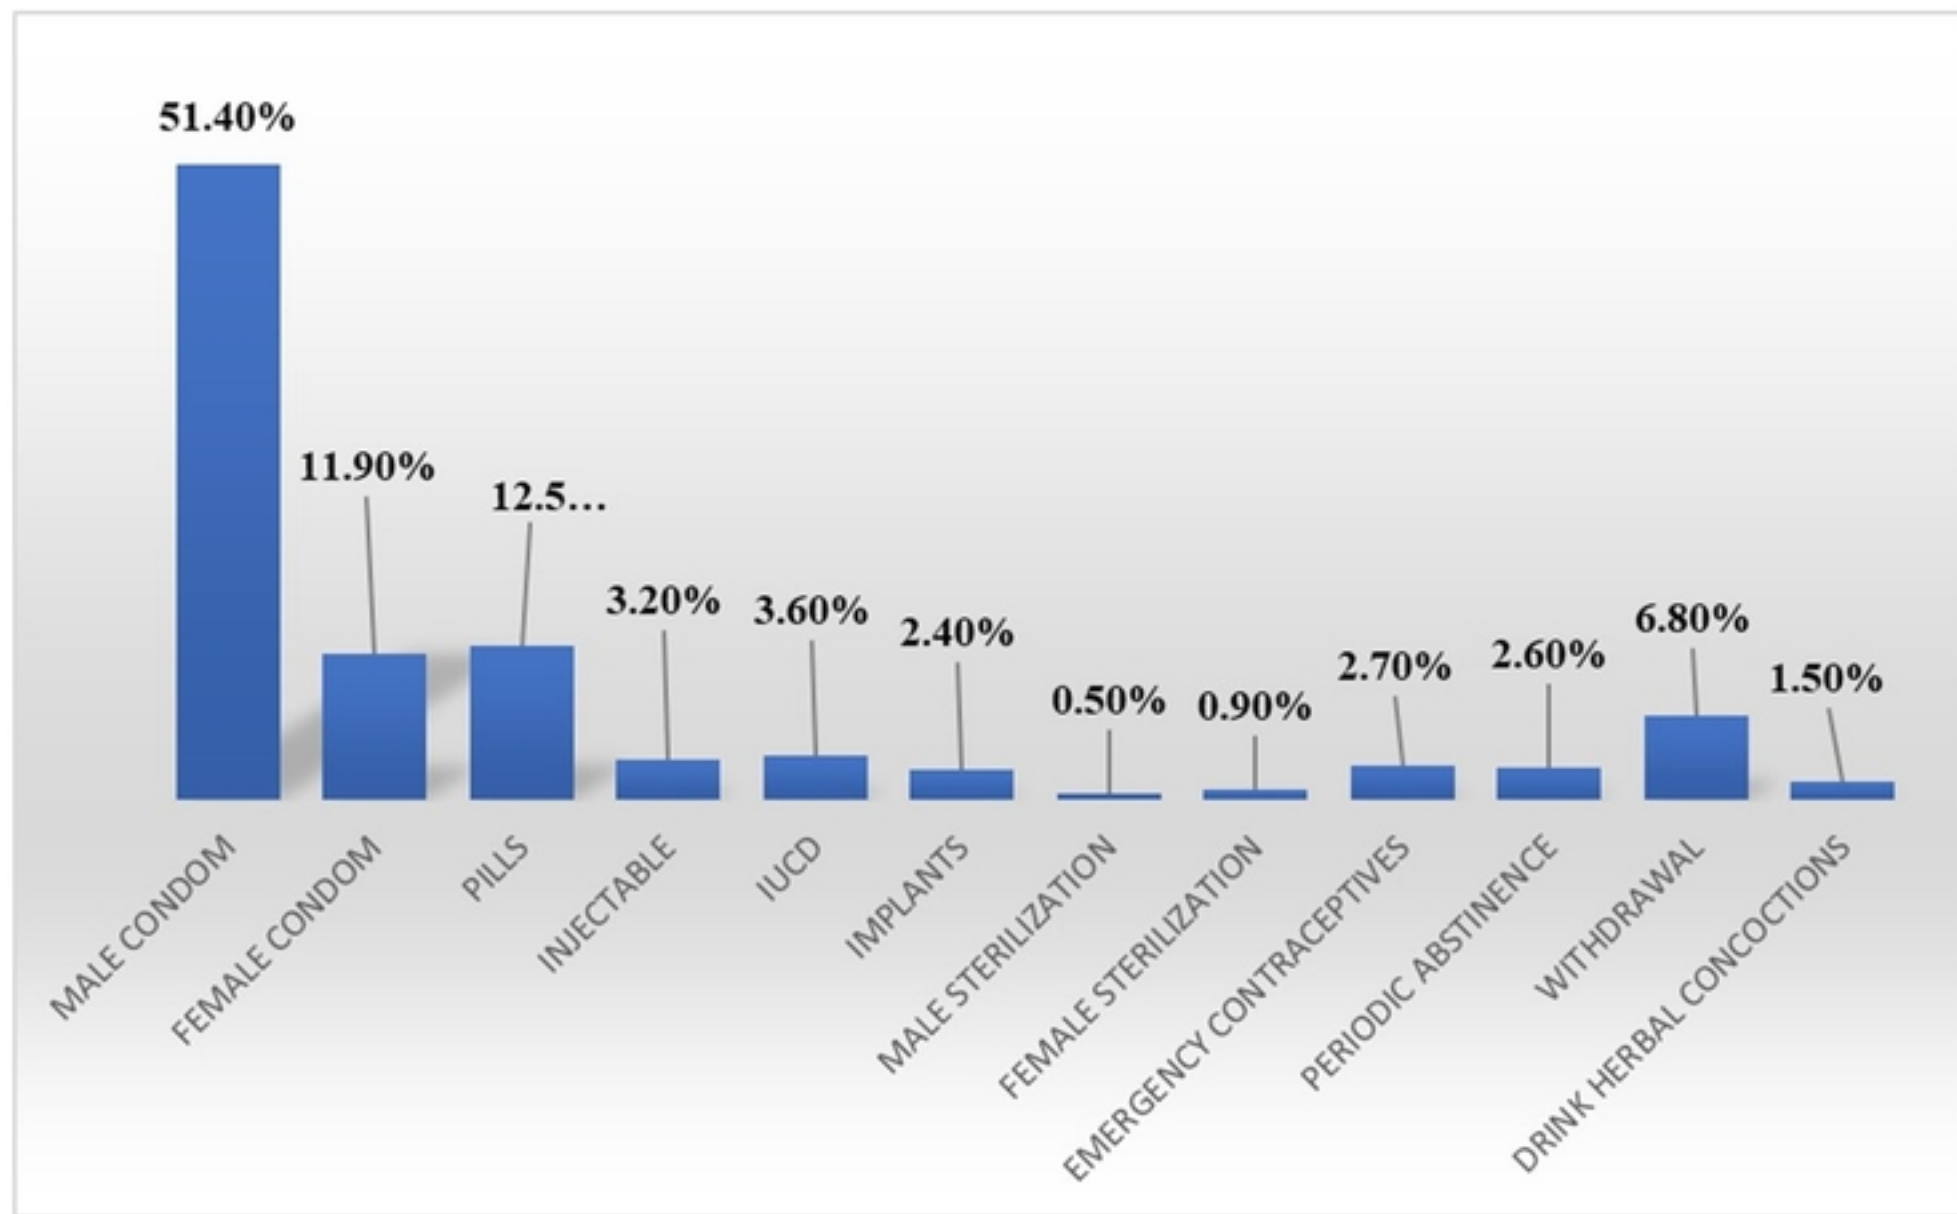

Contraceptive Methods Used Among Sexually Active WLHIV
